# Supplementary material
Source: PubMed Central journal article supplement (PMC2689128)

## Supplement

**Figure S1. CVB3 or LCMV infection of prediabetic NOD mice causes PD-L1 up-regulation on all subsets of lymphoid cells in the pancreatic LN and spleen.**

Percentage of PD-L1<sup>hi</sup> cells over time in CD4<sup>+</sup> T cells, CD8<sup>+</sup> T cells, B cells and DCs from the pancreatic LN (left) and spleen (right) of NOD mice after infection with CVB3 (top) or LCMV (bottom) at 9 weeks old, measured by flow cytometry. Shown is that average percentage of PD-L1<sup>hi</sup> cells  $\pm$  standard deviation obtained using 2 to 11 individual mice per group/time point.

**Figure S2. Inhibition of LCMV-induced up-regulation of PD-L1 on lymphoid cells using PD-L1 siRNA.**

(A) Percentage of PD-L1<sup>hi</sup> cells in NOD splenocytes cultured for 24 h *in vitro* with media alone or LCMV (MOI=1) after electroporation in the absence of RNA (None) or transfection with a control, scrambled-sequence siRNA (Control), measured by flow cytometry. Shown is the average percentage of PD-L1<sup>hi</sup> cells  $\pm$  standard deviation for each group in duplicate. (B) Representative flow cytometry histogram plots showing PD-L1 expression in the “None” (black dotted lines) and “Control” (green solid lines) groups. Numbers indicate the average percentage of PD-L1<sup>hi</sup> cells for each group in duplicate. Gray histograms represent isotype control staining. (C) PD-1 and CD44 expression by IGRP-specific CD8<sup>+</sup> T cells in the pancreatic LN and spleen of 12-week-old NOD mice infected 21 days prior with LCMV and simultaneously injected with a cationic vehicle alone (LCMV, green bars) or containing PD-L1 siRNA #76238 (LCMV+PD-L1si, white bars), measured by flow cytometry. Shown is the average percentage of PD-1<sup>+</sup> or CD44<sup>hi</sup> gated tetramer<sup>+</sup> cells  $\pm$  standard deviation for 6 individual mice per group.

**Figure S3. Proposed model for prevention of T1D by acute viral infection.**

Upon infection by  $\beta$ -cell non-lytic viruses during the prediabetic phase, release of inflammatory cytokines causes a “wave” of PD-L1 up-regulation in lymphoid organs, which curbs diabetogenic CD8<sup>+</sup> T cells and delays the onset of overt diabetes. In parallel, natural Tregs stimulated (by e.g. DCs) under inflammatory conditions expand and acquire enhanced suppressor function, notably via TGF- $\beta$  production. Such invigorated, “inflammation-specific” Tregs take additional advantage of PD-L1/PD-1-mediated demise of autoreactive effectors to efficiently control the remaining diabetogenic T cells, and thus prevent T1D with high efficacy.

# Figure S1

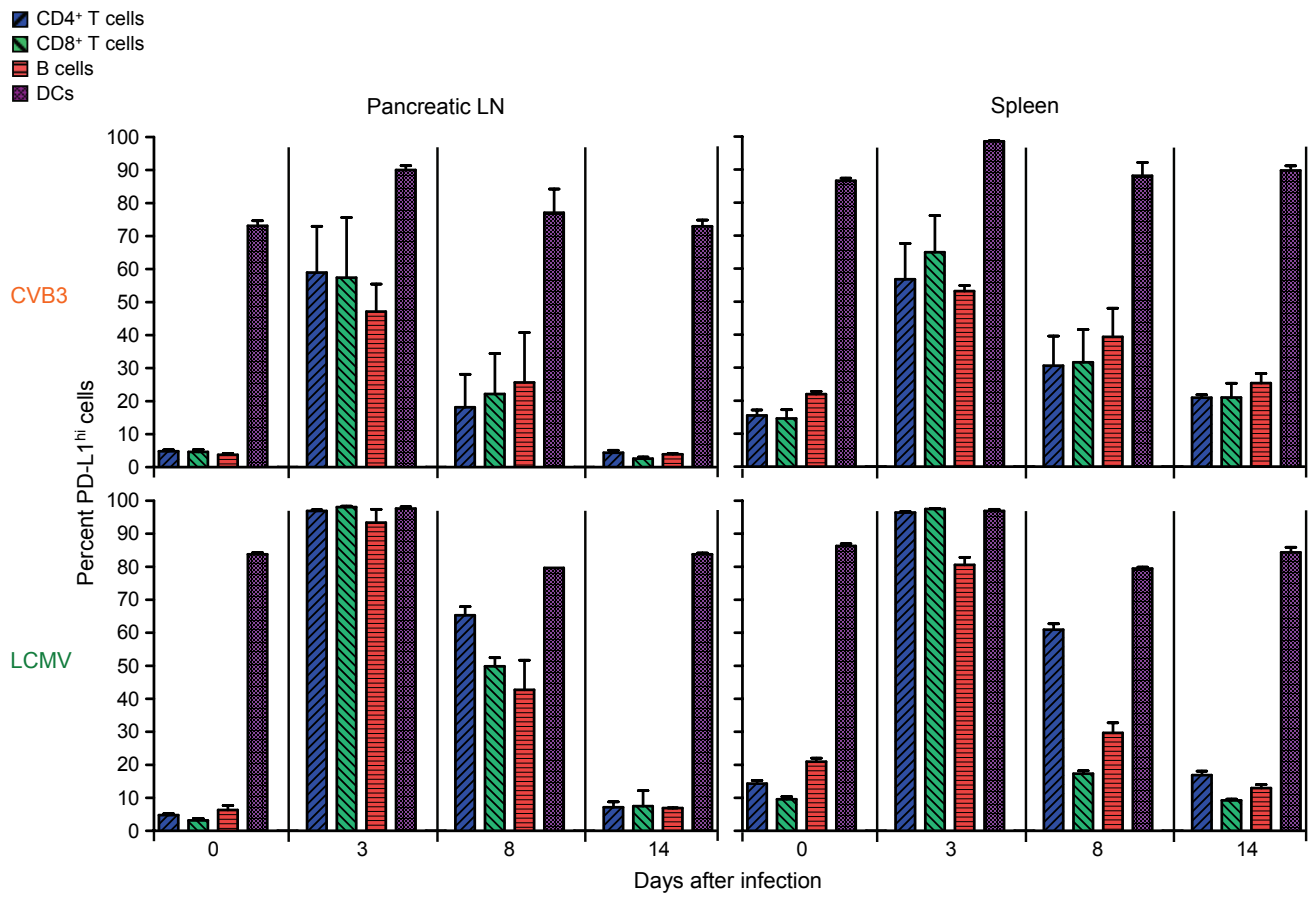

**Figure S2**

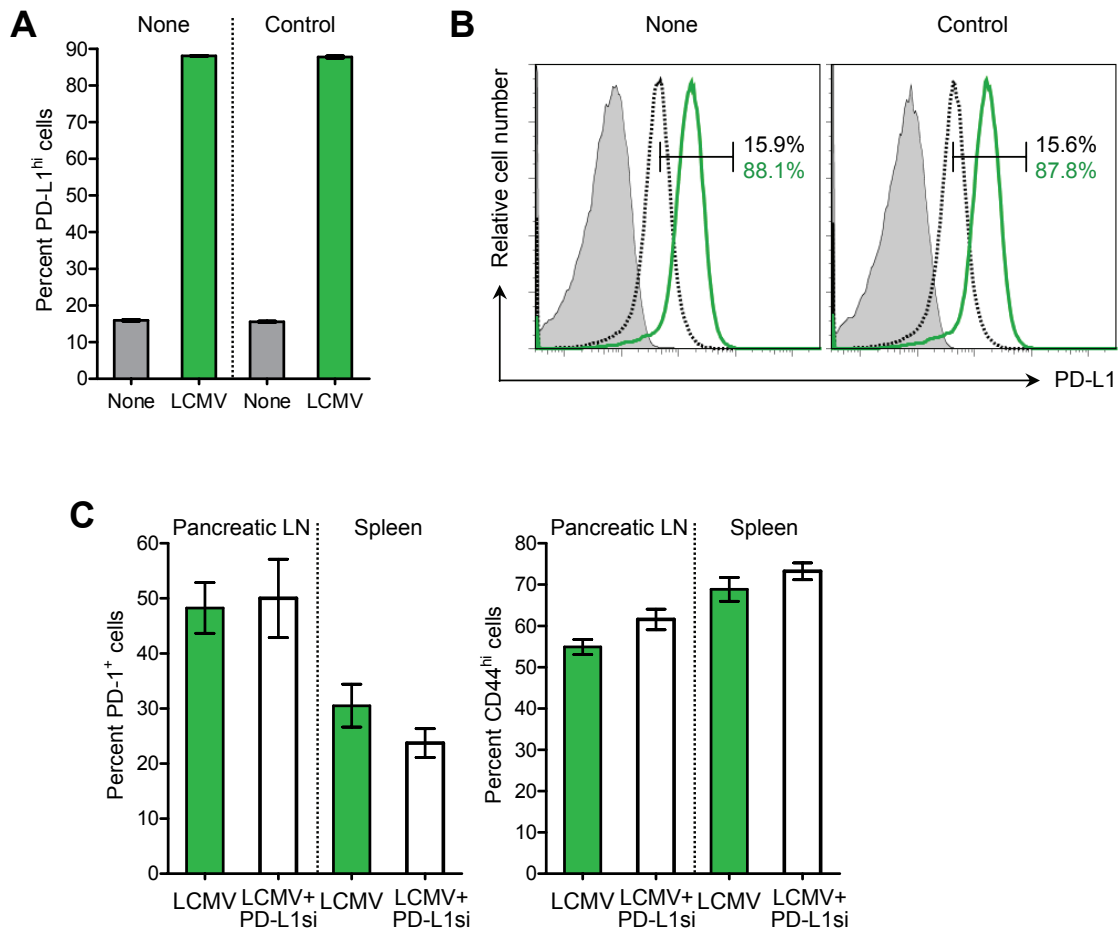

Figure S3

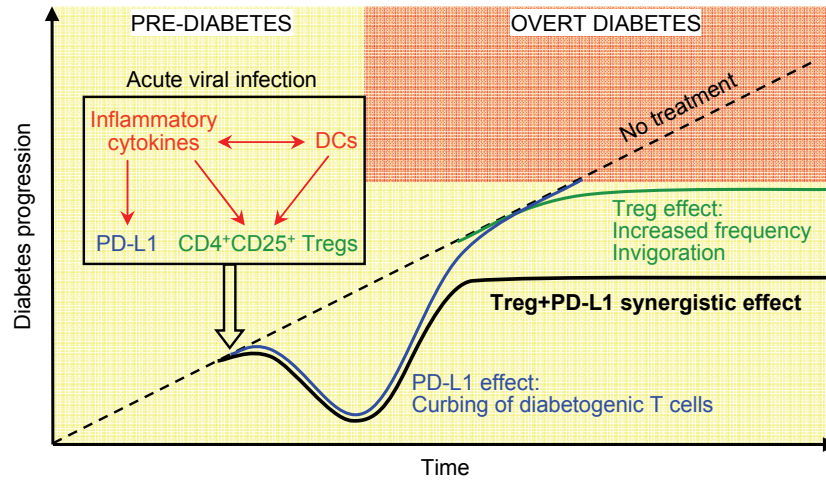

Supplement: JCI38503sd.pdf [file JCI38503sd.pdf]
